RESEARCH ARTICLE

# Association between a miRNA-146a polymorphism and susceptibility to head and neck squamous cell carcinoma in Chinese patients: A meta-analysis of 8 case-control studies

Silin Zhang<sup>1</sup>, Fangling Hu<sup>2</sup>, Hongxing Liang<sup>2</sup>, Yuanzhou Liu<sup>2</sup>, Jianqiang Yang<sup>2</sup>, Wensheng Zhou<sup>2\*</sup>

**1** Department of Otolaryngology, Shenzhen Hospital of Southern Medical University, Shenzhen, China, **2** Department of Otolaryngology, The First Affiliated Hospital of Nanchang University, Nanchang, China

\* [zhouwesh@163.com](mailto:zhouwesh@163.com)

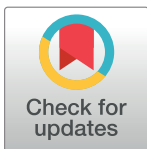

**OPEN ACCESS**

**Citation:** Zhang S, Hu F, Liang H, Liu Y, Yang J, Zhou W (2017) Association between a miRNA-146a polymorphism and susceptibility to head and neck squamous cell carcinoma in Chinese patients: A meta-analysis of 8 case-control studies. PLoS ONE 12(10): e0186609. <https://doi.org/10.1371/journal.pone.0186609>

**Editor:** Qingyi Wei, Duke Cancer Institute, UNITED STATES

**Received:** May 22, 2017

**Accepted:** October 4, 2017

**Published:** October 19, 2017

**Copyright:** © 2017 Zhang et al. This is an open access article distributed under the terms of the [Creative Commons Attribution License](https://creativecommons.org/licenses/by/4.0/), which permits unrestricted use, distribution, and reproduction in any medium, provided the original author and source are credited.

**Data Availability Statement:** All files are available from the PubMed, EMBASE, Web of Science, Chinese Nation Knowledge Infrastructure (CNKI), and WanFang database.

**Funding:** The authors received no funding for this work.

**Competing interests:** The authors have declared that no competing interests exist.

## Abstract

A closer association has been found between the microRNA-146a *rs2910164* polymorphism and the risk of head and neck carcinoma in some molecular epidemiological studies. Recently two meta-analyses were performed to explore the relationship between miRNA-146a polymorphisms and the susceptibility of squamous cell carcinoma of the head and neck (SCCHN); however, they yielded conflicting results in susceptibility regarding ethnic variations. Hence, the present study was performed to explain the relationship between the miRNA-146a *rs2910164* polymorphism and the risk of SCCHN development of Chinese patients. We retrieved databases and screened eligible papers up to March 10, 2017 and then we extracted the essential data. The subgroup analyses were also performed based on the tumor site, region, and genotyping means. Crude odds ratios (OR) at 95% confidence intervals (CI) were chosen to describe the strength of the association. As a result, 6 publications were included in our study which involved 8 independent case-control studies. A significant association was found between miR-146a *rs2910164* polymorphisms and the risk of SCCHN in Chinese patients according to the overall data [CC+CG vs. GG: OR = 1.13; 95% CI = 1.00–1.29; CC vs. GG: OR = 1.19; 95%CI = 1.03–1.38]. According to the subgroup analysis based on tumor site, the risk of cancer was significantly increased among laryngeal cancer (dominant model: OR = 1.76, 95%CI = 1.26–2.46, P = 0.001; homozygote model: OR = 1.83, 95%CI = 1.25–2.67, P = 0.002) and nasopharyngeal carcinoma (homozygote model: OR = 1.41, 95%CI = 1.05–1.90, P = 0.022). In summary, variant alleles of miR-146a *rs2910164* alleles may have an association with the increased risk of SCCHN in Chinese patients, and these associations differed based on tumor site. Further studies including a larger sample size will be necessary to clarify these results.

## Introduction

Squamous cell carcinoma of the head and neck (SCCHN) is the sixth common cancers [1]; approximately 53640 new cases and 11520 deaths were reported in 2013 in the United States [2]. Human papillomavirus (*HPV*) is etiologically responsible for a distinct subset of SCCHN. The incidence of *HPV*-associated squamous cell carcinoma is increasing now even though the incidence of *HPV*-negative SCC may be increasing in some geographical areas, while in general there is a constant decline [3, 4]. There are regional differences in the incidence of SCCHN, for which the epicenter includes southeast Asia, central Europe, eastern Europe, Latin America, and it was the most common tumor in India[5]. The effects of advanced SCCHN treatment are poor, which resulted in severe disability, poor survival rates and reduced life quality of patients.

Cancer is caused by unregulated gene expression related to environmental factors and the susceptibility of individuals' genetic. The etiology of SSSHCHN was associated with *HPV*, tobacco, alcohol, and some molecular drivers. Recently, studies elucidated a new mechanism of micro-RNA (miRNAs) mediated transcriptional regulation. MiRNAs are small fragment RNAs and are composed by approximately 20–22 nucleotides, which can negatively regulate the efficiency and stability of mRNAs translational by targeting specific mRNAs [6]. It has been demonstrated the expression of roughly 10~30% of all human genes can be regulated by mature miRNAs[7].

Aberrant expression of miRNA-146a is related to many cancers[8]. Meanwhile, more and more published papers has revealed that the *rs2910164 G>C* polymorphism of miRNA-146a was associated with a number of carcinomas[9] and there is an ethnicity-dependent relationship between the risk of cancer and the *rs2910164* polymorphism[10]. In recent years, four meta-analyses have studied the associations between miRNA-146a polymorphisms and the risk of SCCHN [11–14], but the results were conflict. Considering that the incidence of SSSHCHN differed by ethnicity and region and polymorphisms are associated with specific environments[15, 16], we performed a meta-analysis to study the association between the *rs2910164* polymorphism of miRNA-146a and SCCHN risk in Chinese patients.

## Materials and methods

### Publication search

To search all potentially eligible studies focus on the association of miRNA polymorphisms and the risk of SCCHN, we conducted a systematic search for all papers published up to March 10, 2017 on the PubMed, EMBASE, Web of Science, Chinese Nation Knowledge Infrastructure (CNKI), and WanFang databases. The search terms we used in this study were “miRNA-146a”, “hand and neck cancer”, “nasopharyngeal cancer”, “laryngeal cancer”, and “mouth neoplasm”. We also screened the references of the retrieved articles and review articles. The inclusion criteria of eligible studies were as follows: 1) full-text study, 2) study the relationship between miRNA polymorphisms and the risk of cancer, 3) independent case-control design, and 4) sufficient data to estimate a P-value and the odds ratio (OR) with 95% confidence interval (CI). Studies were considered as two or more independent studies if they had two or more case-control groups.

### Data extraction

The published papers which met the inclusion criteria were reviewed and extracted information independently by two investigators. The two investigators reached an agreement in the case of a conflict views by discussion. Each publication was sought for the following

information: the surname of first author, the publication year, tumor site, region of organization, source of control groups, genotyping means, and the numbers of cases and controls for each genotype. The Newcastle-Ottawa Scale (NOS) was chosen to assess the methodological quality of case-control studies[17].

## Statistical analysis

To investigate the departure of the miRNA polymorphisms frequencies from expectation for each study under the Hardy-Weinberg equilibrium (HWE), the goodness-of-fit test (chi-square or Fisher exact test) in controls was used.

According to the methods published by Woolf et al.[18], the strength of association was assessed between miRNA polymorphisms and the risk of cancer by crude OR corresponding to 95% CI. Z-test was performed to determine the significance of the pooled OR, and a P-value of  $< 0.05$  was considered statistically significant. The study was performed in allelic contrast (C vs. G), homozygote comparisons (CC vs. GG), heterozygote comparisons (GC vs. GG), dominant models (CC+GC vs. GG), recessive models (CC vs. GC+GG), and additive models (GG+CC vs GC) respectively to determine the relationship of genetic variants and the risk of cancer. According to tumor site (nasopharyngeal, oral, and laryngeal), region (Hong Kong, Taiwan, and Inland), and genotyping methods (Taqman, PCR, PCR-RFLP, and Illumina), we performed the subgroup analyses.

We conducted the analyses of between-study heterogeneity by a chi-squared-based Q-statistic test. If the P-value for the Q-test was  $>0.05$ ,  $I^2$  was  $<50\%$ , indicating the absence of heterogeneity, which yielded wide CIs, the Mantel-Haenszel method was chosen to calculate pooled OR in a fixed-effect model[19]; otherwise, the DerSimonian and Laird method was chosen to calculate pooled OR via a random-effect model [20].

The results stability and reliability was evaluated using sensitivity analysis. One study from the database was deleted each time and the analyses were repeated. We considered overall results of were stable if the data showed that the overall results were not statistically changed in the overall analysis.

Publication bias was examined visually from funnel plots, An evident publication bias might exist if the plot was asymmetrical. Egger's linear regression test was used to evaluate the symmetry of the funnel plot in order to minimize the subjective influence of the visual inspection assessment [21]. If the funnel plot was asymmetrical or the P-value of the Egger's test was  $<0.05$ , then that was considered an indication of potential publication bias. All statistical analyses were carried out using STATA 14.0 software (Stata Corporation, TX, USA).

## Result

### Study identification

According to our search strategy, 1484 articles were initially screened, which included 639 articles from PubMed, 78 articles from Embase, 756 articles from Web of Science, 7 articles from CNKI, and 4 articles from WanFang. After removing duplicates and irrelevant studies, there were 139 articles left. Non-Chinese studies were excluded through author addresses and abstracts, which left 8 Chinese studies, including one non-case-control study[22] and one paper studied the association between the miR-146a and papillary thyroid carcinoma (PTC) [23]. Finally, 6 studies[24–29] discussed the association of miRNA-146a polymorphisms and the risk of SSCHN. Notably, the present meta-analysis included 6 papers but contained 8 case-control studies because there were two papers, by Chen et al. and Lung et al. respectively, included four independent studies (Fig 1).

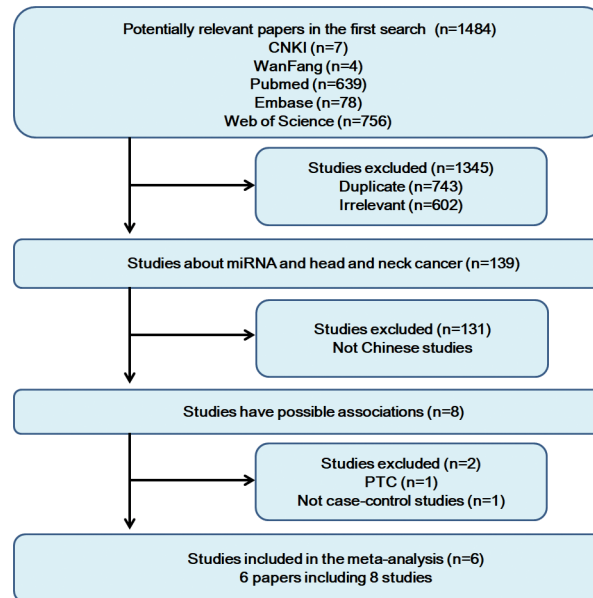

**Fig 1. The flow diagram of included/excluded studies.**

<https://doi.org/10.1371/journal.pone.0186609.g001>

Of the six papers, one article was a study for laryngeal cancer, two articles were studies for oral cancer, two articles were studies for nasopharyngeal carcinoma, and one article was a mixed study; three of them were from the mainland, two from Taiwan, and one from Hong Kong. In terms of genotyping methods, 2 articles used Taqman, 2 articles PCR-RFLP, 1 article PCR, and 1 article Illumina. For the miR-146a rs2910164 polymorphism, our study included 2485 cases and 11034 controls. All NOS scores were greater than 5 stars (NOS scores greater than 5 stars define a good article). The genotypic distribution of most of the studied SNPs in controls agreed with HWE ( $P > 0.05$ ). More detail can be found in [Table 1](#).

### Quantitative synthesis

The ORs by a fixed-effect model (Mantel-Haenszel) were as follows: for the dominant model, GC+CC vs GG: OR = 1.13; 95%CI = 1.00 ~ 1.29,  $p = 0.156$  for heterogeneity,  $I^2 = 34.1\%$ ;

**Table 1. Characteristics of studies included in the meta-analysis.**

| First Author | Year | Region   | Tumor site | Genotyping method | GG           | GC           | GC           | Total        | HWE*  | NOS |
|--------------|------|----------|------------|-------------------|--------------|--------------|--------------|--------------|-------|-----|
|              |      |          |            |                   | case/control | case/control | case/control | case/control |       |     |
| Miao         | 2016 | Inland   | Oral       | Illumina          | 154/497      | 228/773      | 80/278       | 576/1552     | 0.468 | 7   |
| Lin          | 2014 | Inland   | Laryngel   | Taqman            | 31/139       | 110/220      | 63/81        | 204/440      | 0.71  | 7   |
| Chu          | 2012 | TaiWan   | Oral       | PCR-RFLP          | 54/54        | 242/196      | 174/175      | 470/425      | 0.94  | 7   |
| Lung(1)      | 2013 | HongKong | NP         | PCR               | 24/497       | 88/1807      | 117/1472     | 229/3776     | 0.12  | 7   |
| Lung(2)      | 2013 | HongKong | NP         | PCR               | 24/18        | 88/86        | 117/59       | 229/163      | 0.133 | 7   |
| Huang        | 2014 | Inland   | NP         | PCR-RFLP          | 23/36        | 73/110       | 64/54        | 160/200      | 0.154 | 7   |
| Chen(1)      | 2016 | TaiWan   | Laryngel   | Taqman            | 16/103       | 77/293       | 53/272       | 188/197      | 0.1   | 7   |
| Chen(2)      | 2016 | TaiWan   | Oral       | Taqman            | 71/103       | 241/293      | 200/272      | 658/668      | 0.12  | 7   |

HWE: Hardy-Weinberg equilibrium; PCR: polymerase chain reaction; PCR-RFLP: polymerase chain reaction-restriction fragment length polymorphism

\*P value for HWE in control

NP: Nasopharygeal

<https://doi.org/10.1371/journal.pone.0186609.t001>

homozygote model, CC vs GG: OR = 1.19; 95%CI = 1.03 ~ 1.38,  $p = 0.054$  for heterogeneity,  $I^2 = 49.5\%$ ; and heterozygote comparisons, GC vs. GG: OR = 1.10; 95%CI = 0.97 ~ 1.26,  $p = 0.284$  for heterogeneity,  $I^2 = 18.5\%$ . The ORs by a random-effect model (DerSimonian and Laird) were as follows: for the allelic contrast, C vs. G: OR = 1.12; 95%CI = 0.99 ~ 1.26,  $p = 0.008$  for heterogeneity,  $I^2 = 63.3\%$ ; recessive models, CC vs. GC+GG: OR = 1.14; 95% CI = 0.96 ~ 1.35,  $p = 0.007$  for heterogeneity,  $I^2 = 64.3\%$ ; and additive models, GG+CC vs GC: OR = 1.03; 95%CI = 0.89 ~ 1.18,  $p = 0.045$  for heterogeneity,  $I^2 = 51.3\%$  (Fig 2). These data revealed that the dominant model and homozygote model may be risk factors in Chinese patients for SSCHN development.

To assess the effect of other factors on the results, we performed subgroup analysis based on the tumor site, region, cancer type, and genotyping method.

In the subgroup analysis based on tumor site, the risks of cancer were significantly increased for laryngeal cancer (dominant model: OR = 1.76, 95%CI = 1.26 ~ 2.46,  $P = 0.001$ ; homozygote model: OR = 1.83, 95%CI = 1.25 ~ 2.67,  $P = 0.002$ ) and nasopharyngeal carcinoma (homozygote model: OR = 1.41, 95%CI = 1.05 ~ 1.90,  $P = 0.022$ ). In the subgroup analysis based on region, the ORs of the homozygote model are statistically significant for Hong Kong and Inland; significantly evaluated risk was not observed for Taiwan in these genetic models. The results in the subgroup analysis for PCR was significant (dominant model: OR = 1.42, 95%CI = 1.00 ~ 2.01,  $P = 0.047$ ; allelic contrast: OR = 1.28, 95%CI = 1.10 ~ 1.50,  $P = 0.002$ ) (Table 2).

## Sensitivity analysis and publication bias

Begg's test was performed to determine the subjective assessment of the publication bias, and the symmetrical plots for the two genetic models were found (dominant model:  $z = 1.24$ ,  $P = 0.216$ ; homozygote model:  $z = 1.48$ ,  $P = 0.138$ ) (Fig 3); the Egger's linear regression test also revealed that publication bias was not evident (dominant model:  $t = 1.76$ ,  $P = 0.130$ ; homozygote model:  $t = 1.84$ ,  $P = 0.115$ ) (Fig 4).

Sensitivity analysis showed that the removal of individual documents in turn did not change the OR effect of the combined effect, which indicated that the results was stable in the meta-analysis (Fig 5).

## Discussion

MiRNA-146a polymorphisms may be associated with susceptibility to various tumors. Since 2008, when Jazdzewski et al. reported that the miRNA-146a heterozygous model had increased risk of thyroid cancer for the first time [30], there were a series of different findings related to SCCHN and the results of the meta-analyses were different. There are four meta-analyses of head and neck cancer, of which 2 studies have synthesized thyroid cancer and head and neck cancer quantitatively [13, 14]; the other 2 studies [11, 12] contained research on SCCHN.

However, the SCCHN meta-analysis results were conflicting. One study performed by Xiang et al. [12] indicated the existence of the variant C allele of miR-146a correlated with increased risk of SCCHN, but no association could be observed in the Asian subgroup. The paper by Chen et al. [11] showed no significant differences in the association of the polymorphism of miR-146a and the SCCHN risk between patients and healthy controls, but the subgroup analysis results showed significant differences in this association in Chinese populations. Notably, a non-case-control study [22] was included by Chen et al. [11], and the heterogeneity of the results was large and no heterogeneity source was found. They did not take into account genetic differences between ethnicities and regions, and their results may not suitable for the Chinese population.

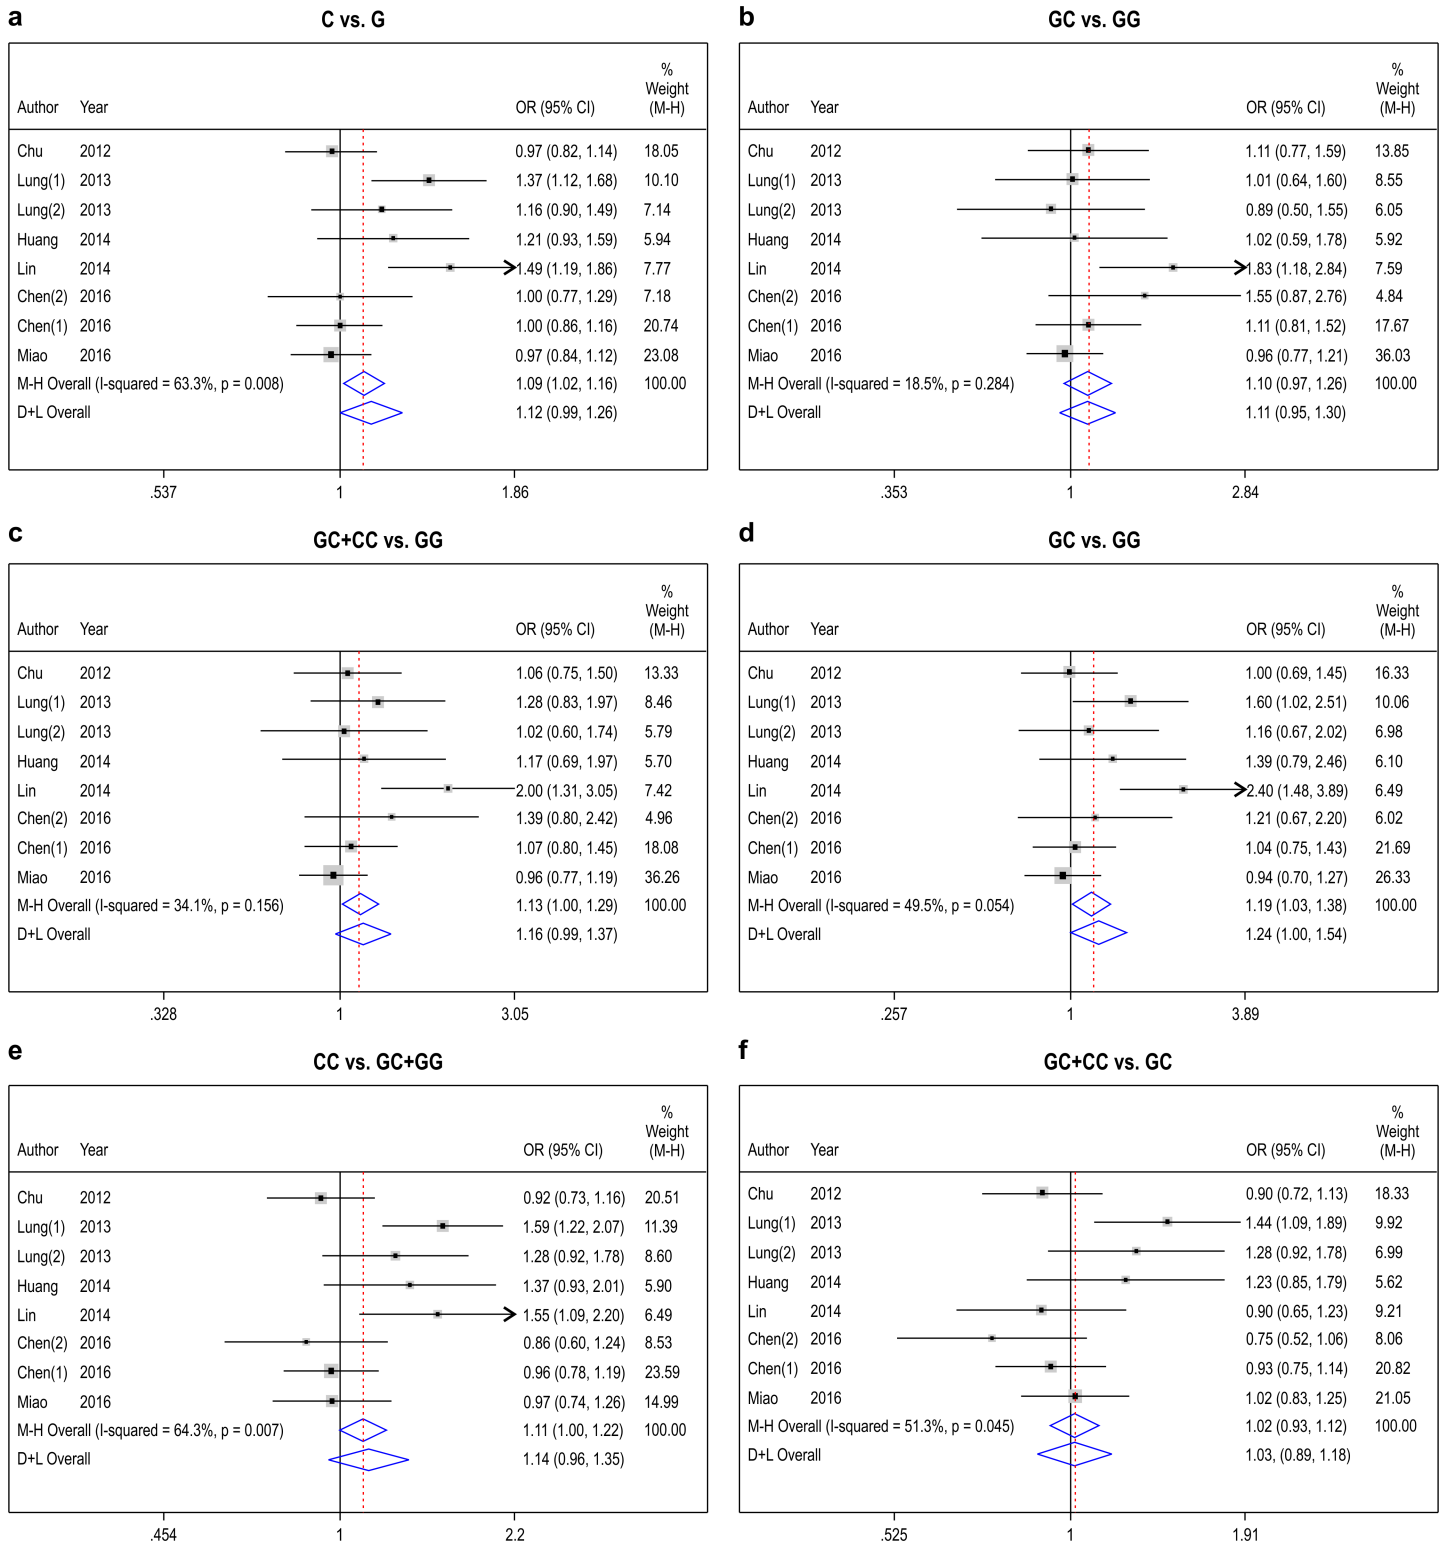

**Fig 2. The forest of different model.** (a) allelic contrast (b) heterozygote comparisons (c) dominant model (d) homozygote comparisons, (e) recessive models (f) additive models.

<https://doi.org/10.1371/journal.pone.0186609.g002>

**Table 2. Main results of the pooled data in the meta-analysis.**

|                   | No. of studies | C vs. G         |       |                | CC vs. GG       |       |                | GC+CC vs. GG    |       |                |
|-------------------|----------------|-----------------|-------|----------------|-----------------|-------|----------------|-----------------|-------|----------------|
|                   |                | OR(95% CI)      | P     | P <sup>#</sup> | OR(95% CI)      | P     | P <sup>#</sup> | OR(95% CI)      | P     | P <sup>#</sup> |
| Total             | 8              | 1.09(1.02–1.16) | 0.008 | 0.015          | 1.19(1.03–1.38) | 0.054 | 0.018          | 1.13(1.00–1.29) | 0.156 | 0.05           |
| Tumor site        |                |                 |       |                |                 |       |                |                 |       |                |
| Oral              | 3              | 0.98(0.90–1.07) | 0.956 | 0.655          | 0.99(0.82–1.20) | 0.914 | 0.913          | 1.01(0.86–1.18) | 0.793 | 0.914          |
| Laryngeal         | 2              | 1.25(1.06–1.49) | 0.023 | 0.009          | 1.83(1.25–2.67) | 0.082 | 0.002          | 1.76(1.26–2.46) | 0.306 | 0.001          |
| NP                | 3              | 1.27(1.10–1.45) | 0.569 | 0.001          | 1.41(1.05–1.90) | 0.682 | 0.022          | 1.17(0.89–1.55) | 0.82  | 0.266          |
| Region            |                |                 |       |                |                 |       |                |                 |       |                |
| HongKong          | 2              | 1.28(1.10–1.50) | 0.315 | 0.002          | 1.42(1.00–2.01) | 0.382 | 0.047          | 1.18(0.84–1.64) | 0.528 | 0.343          |
| Taiwan            | 3              | 1.00(0.89–1.09) | 0.963 | 0.816          | 1.05(0.84–1.31) | 0.86  | 0.69           | 1.11(0.90–1.37) | 0.684 | 0.322          |
| Inland            | 3              | 1.12(1.00–1.25) | 0.005 | 0.046          | 1.26(1.00–1.58) | 0.005 | 0.049          | 1.14(0.95–1.36) | 0.009 | 0.152          |
| Genotyping method |                |                 |       |                |                 |       |                |                 |       |                |
| Taqman            | 3              | 1.14(0.88–1.47) | 0.011 | 0.082          | 1.43(0.84–2.43) | 0.018 | 0.023          | 1.41(0.95–2.11) | 0.060 | 0.008          |
| PCR-RFLR          | 2              | 1.03(0.90–1.19) | 0.166 | 0.672          | 1.10(0.81–1.51) | 0.338 | 0.533          | 1.09(0.82–1.46) | 0.756 | 0.558          |
| PCR               | 2              | 1.28(1.10–1.50) | 0.315 | 0.002          | 1.42(1.00–2.01) | 0.382 | 0.047          | 1.17(0.84–1.64) | 0.528 | 0.343          |
| Illumina          | 1              | 0.97(0.84–1.12) | NA    | 0.690          | 0.94(0.70–1.27) | NA    | 0.018          | 0.96(0.77–1.19) | NA    | 0.696          |

NP: Nasopharyngeal; P: p-value of the heterogeneity; P#: p-value of the significance

<https://doi.org/10.1371/journal.pone.0186609.t002>

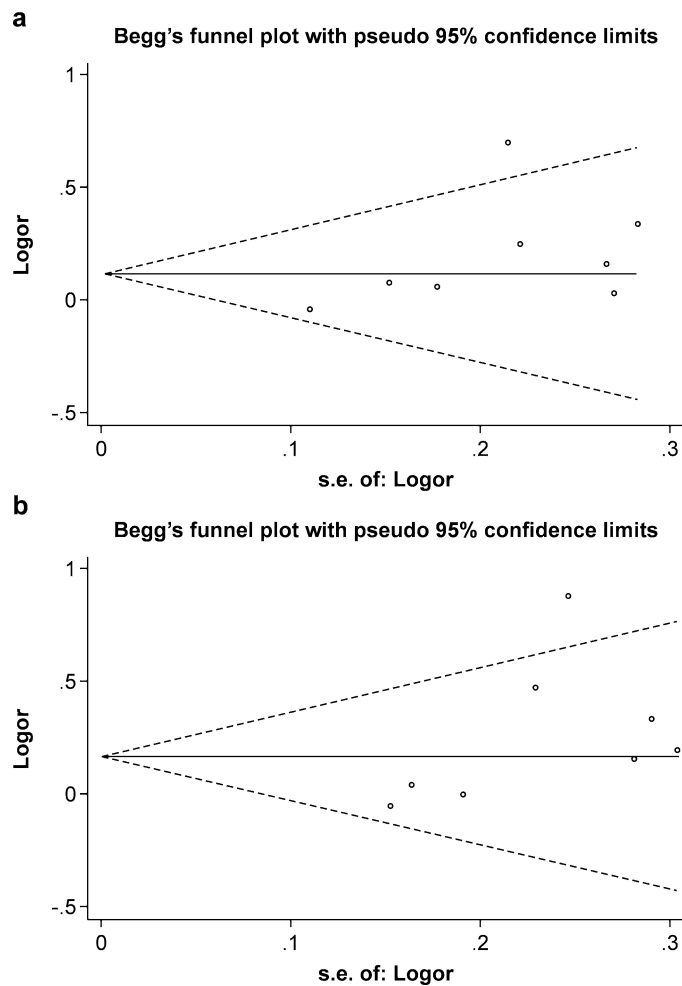

**Fig 3. The funnel plot of different model. (a) dominant model; (b) homozygote model.**

<https://doi.org/10.1371/journal.pone.0186609.g003>



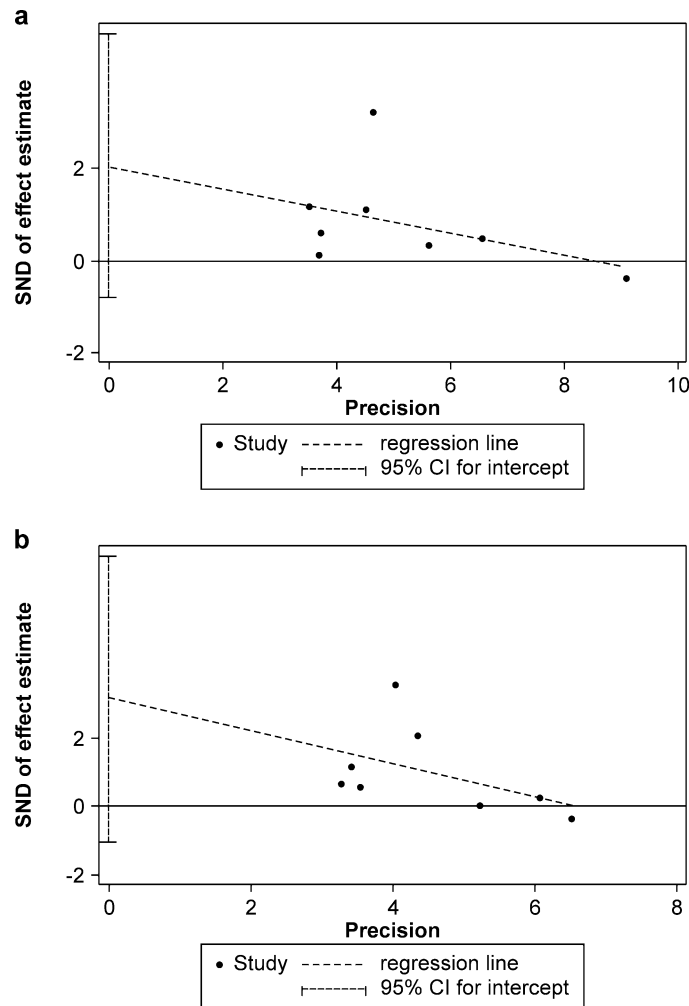

**Fig 4. Egger’s publication bias plot of different model.** (a) dominant model; (b) homozygote model.

<https://doi.org/10.1371/journal.pone.0186609.g004>

In this study, we found that the miRNA-146a polymorphisms were associated with SCCHN susceptibility, and that the dominant and homozygote models may have increased risk of SCCHN, but such did not emerge in heterozygote comparisons. The results were different from the study of Chen et al.[11], which may be related to the number of studies. Subgroup analysis found that this polymorphism also has a relationship with the tumor site and the region of the patients. The dominant model showed increased risk of laryngeal cancer and nasopharyngeal cancer, whereas the homozygote model may have an increased risk of laryngeal cancer. In the context of carcinogenesis, there are varying etiologic exposures associated with different cancers: in SCCHN, etiologic exposures may differ between individuals (within the tumor site) and are known to have different magnitudes of effect by tumor site[31]. Furniss et al.[32] revealed that *HPV16*-seropositive individuals have a higher risk of developing pharyngeal disease compared to other sites. Further, *HPV16* in SCCHN was associated with specific molecular alterations that may have broader implications for a cell’s transcriptome, and so, may differentially impact regulation by miRNAs. Genotyping by different methods showed obvious inconsistencies; the results indicated that the application of PCR may be more helpful in improving the accuracy of the trial.



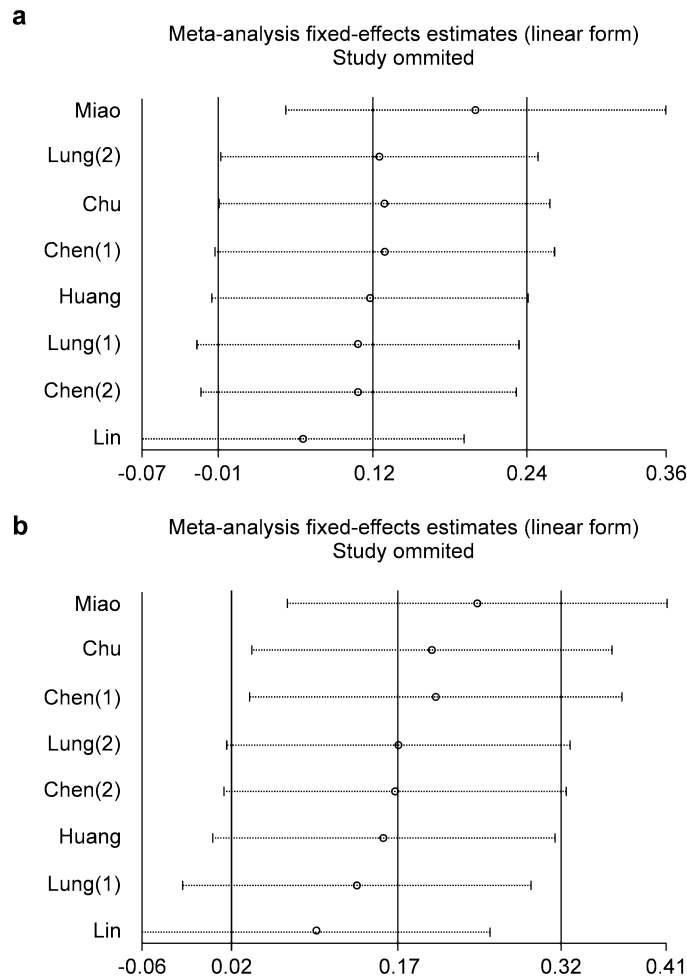

**Fig 5. Sensitivity analysis to reflect the influence of the individual dataset to the pooled ORs in different model through deleting each study.** (a) dominant model; (b) homozygote model.

<https://doi.org/10.1371/journal.pone.0186609.g005>

The mechanism of how miRNA-146a polymorphisms increase the risk of HNC is unclear. The miRNA-146a polymorphism site is located in the precursor region of miRNA-146a, causing a mismatch of C: U in the stem-loop structure of the miRNA[33], which affects the expression of precursor miRNA146a to mature miRNA146[30]. The polymorphic loci significantly increased the breast cancer risk in Chinese Han women[34]; it also affects the development and prognosis of breast cancer[35]. These studies may help explain why the miRNA-146a polymorphism can increase the risk of SCCHN in Chinese patients.

However, there are deficiencies in this meta-analysis. Firstly, there is a slight heterogeneity of the results, which may be related to individual susceptibility, eating habits, and environmental factors. We have not been able to take them into account because of the small size of the dataset. Secondly, the diseases included in the studies have obvious regional characteristics. For example, the literatures of oral cancer mainly come from Taiwan, throat cancer mainly from the mainland, and the cases of the research by Lung et al.[25] were collected from the mainland and Hong Kong. Finally, the included studies had small sample sizes and there were a limited number of studies, which may reduce the statistical power of our results. In our studies, we didn't explore whether the HPV have the effect on the results of miRNA-146a and the susceptibility to SCCHN, because the paper we contained in this study did not distinguish the

*HPV*-positive SCCHN and *HPV*-negative SCCHN cases. Studies have revealed that the some genes patterns of allelic, chromosomal loss and the global gene expression profiles was different between the *HPV*-positive and *HPV*-negative SCCHN[36–38]. And one study has shown that the C-allele of *rs2910164* polymorphism in miRNA-146a was associated with the risk of nasopharyngeal cancer in Chinese[39]. Another study indicated that joint effect of *HPV16* seropositivity and each of these microRNA SNPs increased the risk of oral squamous cell carcinoma (OSCC), although no significant interaction was found for such joint effect on risk of OSCC[40]. According to these studies, we speculated that the *HPV* may have effect on the results of miRNA-146a and the susceptibility to SCCHN, and we will explore this problem in further studies.

In conclusion, this study show that the miRNA-146a polymorphism is associated with susceptibility to SCCHN in Chinese patients, and this polymorphism is related to aspects of the cancer type and the patient's region. In addition, this conclusion will need to be validated by a single disease case-control study with a large sample size.

## Supporting information

### S1 File. Search strategy.

(PDF)

### S1 Table. Genetic-association-studies-checklist.

(PDF)

### S1 Fig. PRISMA 2009 flow diagram.

(PDF)

## Author Contributions

**Data curation:** Silin Zhang, Fangling Hu.

**Investigation:** Hongxing Liang.

**Methodology:** Silin Zhang, Jianqiang Yang.

**Software:** Silin Zhang, Yuanzhou Liu, Jianqiang Yang.

**Writing – original draft:** Silin Zhang.

**Writing – review & editing:** Wensheng Zhou.

## References

1. Jemal A, Bray F, Center MM, Ferlay J, Ward E, Forman D. Global cancer statistics. *CA Cancer J Clin*. 2011; 61(2):69–90. <https://doi.org/10.3322/caac.20107> PMID: 21296855.
2. Siegel R, Naishadham D, Jemal A. Cancer statistics, 2013. *CA Cancer J Clin*. 2013; 63(1):11–30. <https://doi.org/10.3322/caac.21166> PMID: 23335087.
3. Mehanna H, Beech T, Nicholson T, El-Hariry I, McConkey C, Paleri V, et al. Prevalence of human papillomavirus in oropharyngeal and nonoropharyngeal head and neck cancer—systematic review and meta-analysis of trends by time and region. *Head & neck*. 2013; 35(5): 747–55. <https://doi.org/10.1002/hed.22015> PMID: 22267298.
4. Chaturvedi A K, Engels E A, Pfeiffer R M, Hernandez BY, Xiao W, Kim E, et al. Human papillomavirus and rising oropharyngeal cancer incidence in the United States. *Journal of clinical oncology*. 2011; 29(32): 4294–301. <https://doi.org/10.1200/JCO.2011.36.4596> PMID: 21969503.
5. Warnakulasuriya S. Global epidemiology of oral and oropharyngeal cancer. *Oral Oncol*. 2009; 45(4–5):309–16. <https://doi.org/10.1016/j.oraloncology.2008.06.002> PMID: 18804401.
6. Bartel DP. MicroRNAs: genomics, biogenesis, mechanism, and function. *Cell*. 2004; 116(2):281–97. PMID: 14744438

7. Berezikov E, Guryev V, van de Belt J, Wienholds E, Plasterk RH, Cuppen E. Phylogenetic shadowing and computational identification of human microRNA genes. *Cell*. 2005; 120(1):21–4. <https://doi.org/10.1016/j.cell.2004.12.031> PMID: 15652478.
8. Labbaye C, Testa U. The emerging role of MIR-146A in the control of hematopoiesis, immune function and cancer. *J Hematol Oncol*. 2012; 5:13. <https://doi.org/10.1186/1756-8722-5-13> PMID: 22453030.
9. Zhang X, He R, Ren F, Tang R, Chen G. Association of miR-146a rs2910164 polymorphism with squamous cell carcinoma risk: a meta-analysis. *J BUON*. 2015; 20(3):829–41. PMID: 26214637
10. Wang AX, Xu B, Tong N, Chen SQ, Yang Y, Zhang XW, et al. Meta-analysis confirms that a common G/C variant in the pre-miR-146a gene contributes to cancer susceptibility and that ethnicity, gender and smoking status are risk factors. *Genet Mol Res*. 2012; 11(3):3051–62. <https://doi.org/10.4238/2012.August.31.2> PMID: 23007982.
11. Chen XJ, Zhou TY, Chen M, Li N, Liu F. Association of the miRNA146a rs2910164 C>G Polymorphism with Head and Neck Cancer Risk: A Meta-analysis. *Asian Pac J Cancer Prev*. 2015; 16(9):3871–4. PMID: 25987052
12. Xiang Z, Song J, Zhuo X, Li Q, Zhang X. MiR-146a rs2910164 polymorphism and head and neck carcinoma risk: a meta-analysis based on 10 case-control studies. *Oncotarget*. 2017; 8(1):1226–33. <https://doi.org/10.18632/oncotarget.13599> PMID: 27901485.
13. Niu YM, Du XY, Lu MY, Xu QL, Luo J, Shen M. Significant association between functional microRNA polymorphisms and head and neck cancer susceptibility: a comprehensive meta-analysis. *Sci Rep*. 2015; 5:12972. <https://doi.org/10.1038/srep12972> PMID: 26277865.
14. Ma XP, Zhang T, Peng B, Yu L, Jiang de K. Association between microRNA polymorphisms and cancer risk based on the findings of 66 case-control studies. *PLoS One*. 2013; 8(11):e79584. <https://doi.org/10.1371/journal.pone.0079584> PMID: 24278149.
15. Tracey KJ, Cerami A. Tumor necrosis factor, other cytokines and disease. *Annu Rev Cell Biol*. 1993; 9:317–43. <https://doi.org/10.1146/annurev.cb.09.110193.001533> PMID: 8280464.
16. Warnakulasuriya S. Causes of oral cancer—an appraisal of controversies. *Br Dent J*. 2009; 207(10):471–5. <https://doi.org/10.1038/sj.bdj.2009.1009> PMID: 19946320.
17. Cota GF, de Sousa MR, Fereguetti TO, Rabello A. Efficacy of anti-leishmania therapy in visceral leishmaniasis among HIV infected patients: a systematic review with indirect comparison. *PLoS Negl Trop Dis*. 2013; 7(5):e2195. <https://doi.org/10.1371/journal.pntd.0002195> PMID: 23658850.
18. Vanoverschelde JL, Robert AR, Gerbaux A, Michel X, Hanet C, Wijns W. Noninvasive estimation of pulmonary arterial wedge pressure with Doppler transmitral flow velocity pattern in patients with known heart disease. *Am J Cardiol*. 1995; 75(5):383–9. PMID: 7856533
19. Mantel N, Haenszel W. Statistical aspects of the analysis of data from retrospective studies of disease. *J Natl Cancer Inst*. 1959; 22(4):719–48. PMID: 13655060
20. DerSimonian R, Laird N. Meta-analysis in clinical trials. *Control Clin Trials*. 1986; 7(3):177–88. PMID: 3802833
21. Egger M, Davey Smith G, Schneider M, Minder C. Bias in meta-analysis detected by a simple, graphical test. *BMJ*. 1997; 315(7109):629–34. PMID: 9310563
22. Hung PS, Chang KW, Kao SY, Chu TH, Liu CJ, Lin SC. Association between the rs2910164 polymorphism in pre-mir-146a and oral carcinoma progression. *Oral Oncol*. 2012; 48(5):404–8. <https://doi.org/10.1016/j.oraloncology.2011.11.019> PMID: 22182931.
23. Wei WJ, Wang YL, Li DS, Wang Y, Wang XF, Zhu YX, et al. Association between the rs2910164 polymorphism in pre-Mir-146a sequence and thyroid carcinogenesis. *PLoS One*. 2013; 8(2):e56638. <https://doi.org/10.1371/journal.pone.0056638> PMID: 23451063.
24. Chu YH, Tzeng SL, Lin CW, Chien MH, Chen MK, Yang SF. Impacts of microRNA gene polymorphisms on the susceptibility of environmental factors leading to carcinogenesis in oral cancer. *PLoS One*. 2012; 7(6):e39777. <https://doi.org/10.1371/journal.pone.0039777> PMID: 22761899.
25. Lung RW, Wang X, Tong JH, Chau SL, Lau KM, Cheng SH, et al. A single nucleotide polymorphism in microRNA-146a is associated with the risk for nasopharyngeal carcinoma. *Mol Carcinog*. 2013; 52 Suppl 1:E28–38. <https://doi.org/10.1002/mc.21937> PMID: 22711332.
26. Huang GL, Chen ML, Li YZ, Lu Y, Pu XX, He YX, et al. Association of miR-146a gene polymorphism with risk of nasopharyngeal carcinoma in the central-southern Chinese population. *J Hum Genet*. 2014; 59(3):141–4. <https://doi.org/10.1038/jhg.2013.135> PMID: 24430575.
27. Lin D, Dong WD, Lu MP, Xing GQ, Dong JD, Zhang WQ. The association between rs2910164 G>C polymorphism in pre-microRNA-146a and laryngeal cancer in Jiangsu Han population. *J Otolaryngol Ophthal Shangdong Univ*. 2014;(02):46–50.

28. Miao L, Wang L, Zhu L, Du J, Zhu X, Niu Y, et al. Association of microRNA polymorphisms with the risk of head and neck squamous cell carcinoma in a Chinese population: a case-control study. *Chin J Cancer*. 2016; 35(1):77. <https://doi.org/10.1186/s40880-016-0136-9> PMID: 27515039.
29. Chen HC, Tseng YK, Chi CC, Chen YH, Yang CM, Huang SJ, et al. Genetic variants in microRNA-146a (C>G) and microRNA-1269b (G>C) are associated with the decreased risk of oral premalignant lesions, oral cancer, and pharyngeal cancer. *Arch Oral Biol*. 2016; 72:21–32. <https://doi.org/10.1016/j.archoralbio.2016.08.010> PMID: 27525378.
30. Jazdzewski K, Murray EL, Franssila K, Jarzab B, Schoenberg DR, de la Chapelle A. Common SNP in pre-miR-146a decreases mature miR expression and predisposes to papillary thyroid carcinoma. *Proc Natl Acad Sci U S A*. 2008; 105(20):7269–74. <https://doi.org/10.1073/pnas.0802682105> PMID: 18474871.
31. Hui AB, Lenarduzzi M, Krushel T, Waldron L, Pintilie M, Shi W, et al. Comprehensive MicroRNA profiling for head and neck squamous cell carcinomas. *Clin Cancer Res*. 2010; 16(4):1129–39. <https://doi.org/10.1158/1078-0432.CCR-09-2166> PMID: 20145181.
32. Furniss CS, McClean MD, Smith JF, Bryan J, Nelson HH, Peters ES, et al. Human papillomavirus 16 and head and neck squamous cell carcinoma. *Int J Cancer*. 2007; 120(11):2386–92. <https://doi.org/10.1002/ijc.22633> PMID: 17315185.
33. He H, Jazdzewski K, Li W, Liyanarachchi S, Nagy R, Volinia S, et al. The role of microRNA genes in papillary thyroid carcinoma. *Proc Natl Acad Sci U S A*. 2005; 102(52):19075–80. <https://doi.org/10.1073/pnas.0509603102> PMID: 16365291.
34. Hu Z, Liang J, Wang Z, Tian T, Zhou X, Chen J, et al. Common genetic variants in pre-microRNAs were associated with increased risk of breast cancer in Chinese women. *Hum Mutat*. 2009; 30(1):79–84. <https://doi.org/10.1002/humu.20837> PMID: 18634034.
35. Kumaraswamy E, Wendt KL, Augustine LA, Stecklein SR, Sibala EC, Li D, et al. BRCA1 regulation of epidermal growth factor receptor (EGFR) expression in human breast cancer cells involves microRNA-146a and is critical for its tumor suppressor function. *Oncogene*. 2015; 34(33):4333–46. <https://doi.org/10.1038/onc.2014.363> PMID: 25417703.
36. Braakhuis B J, Snijders P J, Keune W J, Meijer C J, Ruijter-Schippers H J, Leemans C R et al. Genetic patterns in head and neck cancers that contain or lack transcriptionally active human papillomavirus. *Journal of the National Cancer Institute*. 2004; 96(13): 998–1006. PMID: 15240783
37. Smeets S J, Braakhuis B J, Abbas S, Snijders P J, Ylstra B, van de Wiel MA, et al. Genome-wide DNA copy number alterations in head and neck squamous cell carcinomas with or without oncogene-expressing human papillomavirus. *Oncogene*. 2006; 25(17): 2558–64. <https://doi.org/10.1038/sj.onc.1209275> PMID: 16314836.
38. Dahlgren L, Mellin H, Wangsa D, Heselmeyer-Haddad K, Björnestrål L, Lindholm J, et al. Comparative genomic hybridization analysis of tonsillar cancer reveals a different pattern of genomic imbalances in human papillomavirus-positive and-negative tumors. *International journal of cancer*. 2003; 107(2): 244–9. <https://doi.org/10.1002/ijc.11371> PMID: 12949801
39. Lung R W, Wang X, Tong J H, Chau S L, Lau K M, Cheng S H, et al. A single nucleotide polymorphism in microRNA-146a is associated with the risk for nasopharyngeal carcinoma. *Molecular carcinogenesis*. 2013; 52(S1): 28–38. <https://doi.org/10.1002/mc.21937> PMID: 22711332.
40. Song X, Sturgis E M, Liu J, Jin L, Wang Z, Zhang C, et al. MicroRNA variants increase the risk of HPV-associated squamous cell carcinoma of the oropharynx in never smokers[J]. *PloS one*, 2013, 8(2): e56622. <https://doi.org/10.1371/journal.pone.0056622> PMID: 23457596.
